# Supplementary material for: Metabolomic Profiling in Acute ST‐Segment–Elevation Myocardial Infarction Identifies Succinate as an Early Marker of Human Ischemia–Reperfusion Injury
Source: PubMed Central journal article supplement — J Am Heart Assoc. 2018 Apr 6;7(8):e007546. doi: 10.1161/JAHA.117.007546 (PMC6015393; doi:10.1161/jaha.117.007546), 2018-04-06

# **SUPPLEMENTAL MATERIAL**

**Figure S1.** Systemic release of metabolites by peripheral tissue in blood. Each bar represents the median and interquartile range of the systemic release ratio. This ratio is the difference between concentrations in peripheral vein and coronary artery, divided by the coronary artery concentration. Positive values represent a release of metabolite in the blood and negative values represent a consumption of the metabolite.

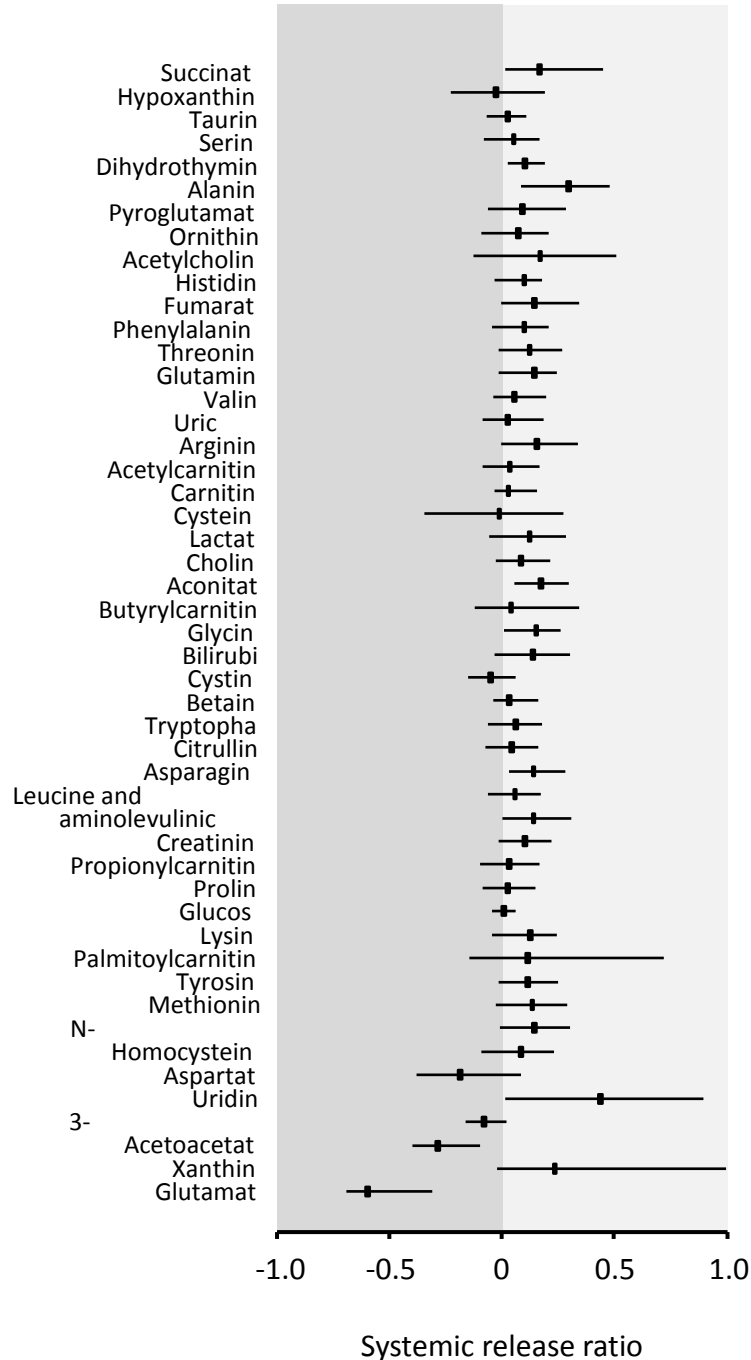

**Figure S2.** Correlation between succinate concentration in the coronary sinus succinate and the area under the curve of troponin release during 48 hours post STEMI.

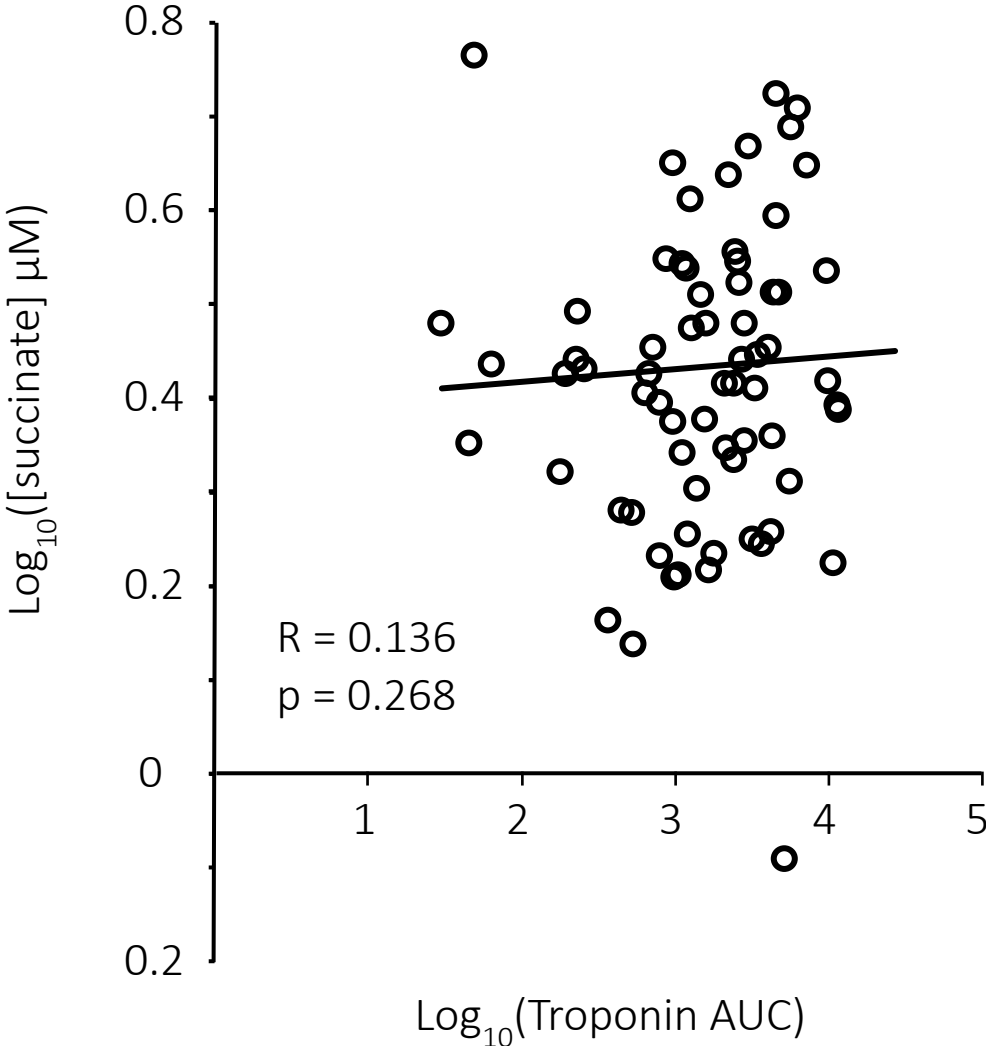

Supplement: JAH3-7-e007546-s001.pdf [file JAH3-7-e007546-s001.pdf]
